# Supplementary material for: Altered Macrophage Polarization Induces Experimental Pulmonary Hypertension and Is Observed in Patients With Pulmonary Arterial Hypertension
Source: PubMed Central journal article supplement — Arterioscler Thromb Vasc Biol. 2020 Nov 5;41(1):430–45. doi: 10.1161/ATVBAHA.120.314639 (PMC7752239; doi:10.1161/atvbaha.120.314639), 2020-11-05
Supplement: atv-41-430-s001.pdf [file atv-41-430-s001.pdf]

## SUPPLEMENTAL MATERIALS

### **Altered macrophage polarisation induces experimental pulmonary hypertension and is observed in patients with pulmonary arterial hypertension.**

Amira Zawia PhD<sup>1</sup>, Nadine D. Arnold<sup>1</sup>, Laura West PhD<sup>1</sup>, Josephine A. Pickworth PhD<sup>1</sup>, Helena Turton<sup>1</sup>, James Iremonger BSc<sup>1</sup>, Adam T. Braithwaite PhD<sup>1</sup>, Jaime Cañedo MSc<sup>1</sup>, Simon A Johnston PhD<sup>1</sup>, A.A. Roger Thompson MRCP PhD<sup>1</sup>, Gaynor Miller PhD<sup>\*2,3</sup>, Allan Lawrie PhD<sup>1\*</sup>

<sup>1</sup>Department of Infection, Immunity & Cardiovascular Disease, University of Sheffield, Sheffield, S10 2RX, United Kingdom. <sup>2</sup>Department of Oncology and Metabolism, University of Sheffield, Sheffield, S10 2RX, United Kingdom. <sup>3</sup>College of Medical and Dental Science, University of Birmingham, Birmingham B15 2TT.

\* Joint Senior Author

## Major Resources Table

In order to allow validation and replication of experiments, all essential research materials listed in the Methods should be included in the Major Resources Table below. Authors are encouraged to use public repositories for protocols, data, code, and other materials and provide persistent identifiers and/or links to repositories when available. Authors may add or delete rows as needed.

### Animals (in vivo studies)

| Species | Vendor or Source        | Background Strain | Sex | Persistent ID / URL |
|---------|-------------------------|-------------------|-----|---------------------|
| mouse   | University of Sheffield | FVB               | M+F |                     |
|         |                         |                   |     |                     |
|         |                         |                   |     |                     |

### Genetically Modified Animals

|                 | Species | Vendor or Source        | Background Strain | Other Information  | Persistent ID / URL |
|-----------------|---------|-------------------------|-------------------|--------------------|---------------------|
| Parent - Male   | mouse   | University of Sheffield | FVB               | Strain: CD68tetDTA |                     |
| Parent - Female | mouse   | University of Sheffield | FVB               | Strain: tetDTA     |                     |

### Antibodies

| Target antigen       | Vendor or Source | Catalog # | Working concentration   | Lot # (preferred but not required) | Persistent ID / URL |
|----------------------|------------------|-----------|-------------------------|------------------------------------|---------------------|
| F4/80                | abcam            | Ab111101  | 1:100                   |                                    |                     |
| iNOS                 | abcam            | Ab115819  | 1:100                   |                                    |                     |
| CD206                | R&D system       | AF2535    | 1:100                   |                                    |                     |
| SMA                  | Agilent          | M0851     | 1:150                   |                                    |                     |
| vWF                  | Agilent          | A0082     | 1:300                   |                                    |                     |
| NF- $\kappa$ B       | Cell signaling   | D14E12    | 1:400                   |                                    |                     |
| FITC anti-mouse CD68 | Biologend        | 137005    | 0.2 $\mu$ g/100 $\mu$ l |                                    |                     |
| PE anti-mouse CD206  | Biologend        | 141705    | 0.2 $\mu$ g/100 $\mu$ l |                                    |                     |
| Pb anti-mouse CD86   | Biologend        | 105021    | 0.5 $\mu$ g/100 $\mu$ l |                                    |                     |
| APC anti-mouse F4/80 | Biologend        | 123115    | 0.2 $\mu$ g/100 $\mu$ l |                                    |                     |
| APC anti-human CD11b | Biologend        | 301309    | 0.2mg/ml                |                                    |                     |
| PE anti-human CD80   | Biologend        | 305207    | 0.2mg/ml                |                                    |                     |
| PE anti-human CD206  | Biologend        | 321105    | 0.2mg/ml                |                                    |                     |
| DTA                  | Abcam            | Ab8308    | 1:2000                  |                                    |                     |

### DNA/cDNA Clones

| Clone Name | Sequence | Source / Repository | Persistent ID / URL |
|------------|----------|---------------------|---------------------|
|            |          |                     |                     |
|            |          |                     |                     |

DOI [to be added]

|  |  |  |  |
|--|--|--|--|
|  |  |  |  |
|--|--|--|--|

**Cultured Cells**

| Name                | Vendor or Source | Sex (F, M, or unknown) | Persistent ID / URL |
|---------------------|------------------|------------------------|---------------------|
| Alveolar macrophage | mouse            | M                      |                     |
| BMDM                | mouse            | M                      |                     |
| PASMCs              | human            | unknown                |                     |
| MDM                 | human            | M+F                    |                     |

**Data & Code Availability**

| Description | Source / Repository | Persistent ID / URL |
|-------------|---------------------|---------------------|
|             |                     |                     |
|             |                     |                     |
|             |                     |                     |

**Other**

| Description                 | Source / Repository | Persistent ID / URL |
|-----------------------------|---------------------|---------------------|
| Doxycycline diet (TD.01306) | ENVIGO              |                     |
|                             |                     |                     |
|                             |                     |                     |

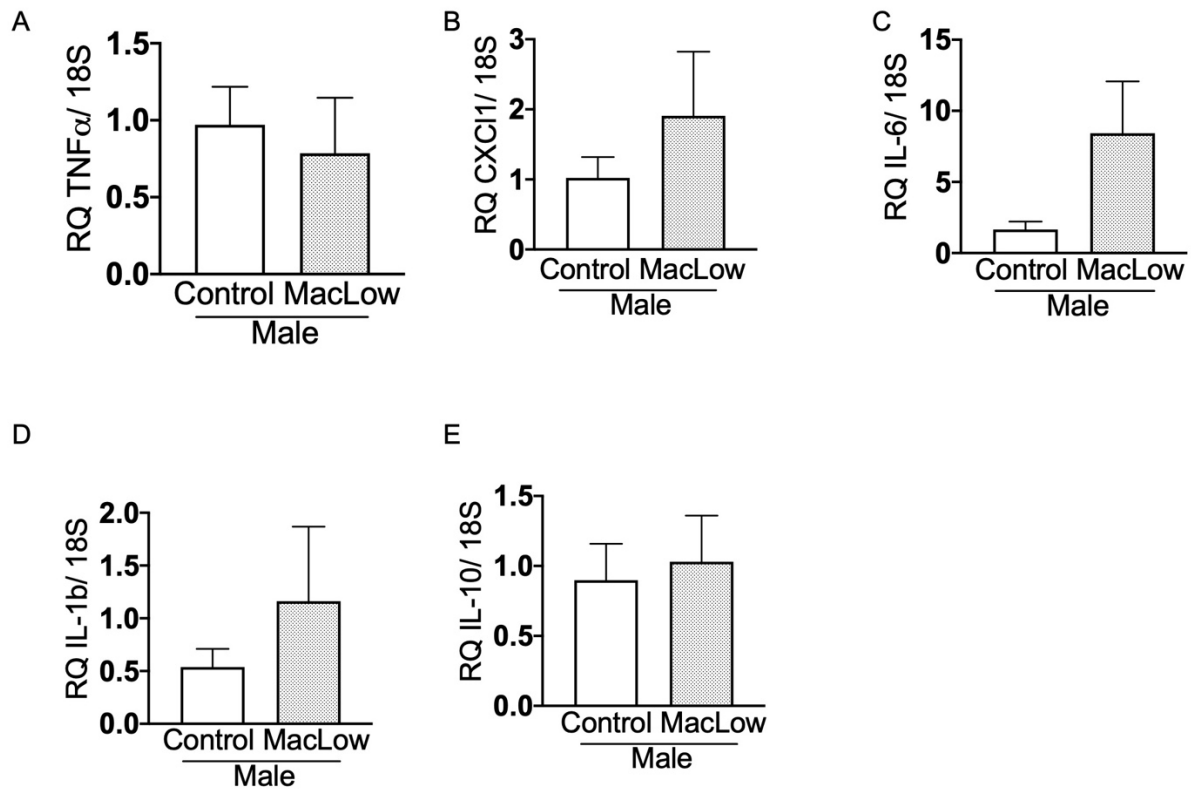

**Supplement Figure I : Effect of macrophage depletion on cytokine- gene expression in male mice:** RNA expression level of (A) TNF $\alpha$ , (B) CXCL1, (C) IL-6, (D) IL-1b and (E) IL-10 was determined in control and MacLow lungs using quantitative q-pcr. Expression data normalised using  $\Delta\Delta CT$  with 18 s mRNA as the endogenous control gene and to the experimental control. Bars show mean  $\pm$ SEM. n=4.

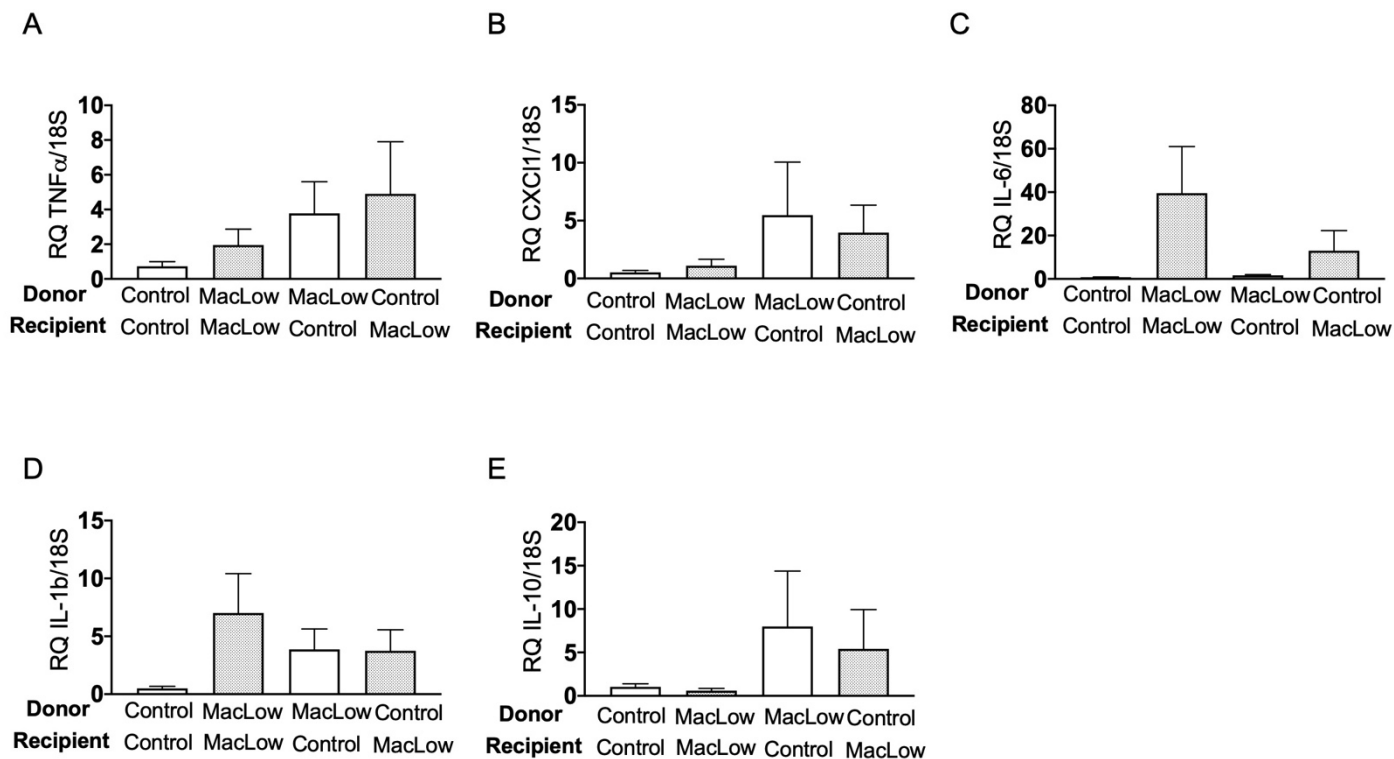

**Supplement Figure II : Effect of macrophage depletion on cytokine- gene expression in chimeric male mice:** RNA expression level of (A) TNF $\alpha$ , (B) CXCL1, (C) IL-6, (D) IL-1b and (E) IL-10 was determined in mouse lung using quantitative q-pcr. Expression data normalised using  $\Delta\Delta CT$  with 18 s mRNA as the endogenous control gene and to the experimental control. Bars show mean  $\pm$ SEM. n=4
